# Supplementary material
Source: PubMed Central journal article supplement (PMC7205993)
Supplement: 42003_2020_896_MOESM2_ESM.pdf [file 42003_2020_896_MOESM2_ESM.pdf]

1. **Supplementary Data 1.** QBC Sequences
2. **Supplementary Data 2.** AHCA Sequences
3. **Supplementary Data 3.** Subcode 1 (SC1), Subcode N (SCN), and Subcode 2(SC2) sequences
4. **Supplementary Data 4.** Subcode 3 (SC3) sequences
5. **Supplementary Data 5.** RNA-specific reverse transcription primer sequences panel for Figure 7b-c
6. **Supplementary Data 6.** RNA-specific reverse transcription primer sequences panel for Figure 8
7. **Supplementary Data 7.** RNA-specific reverse transcription primer sequences panel for Figure 9
8. **Supplementary Data 8.** RNA-specific second strand synthesis primer sequences panel for Figure 7b-c
9. **Supplementary Data 9.** RNA-specific second strand synthesis primer sequences panel for Figure 8
10. **Supplementary Data 10.** RNA-specific second strand synthesis primer sequences panel for Figure 9
11. **Supplementary Data 11.** SNAIL Probes
12. **Supplementary Data 12.** Sequence analysis metrics.
13. **Supplementary Data 13.** Figure data files and cytometry biaxial plot settings
